# Supplementary material for: Novel Mechanism for Surface Layer Shedding and Regenerating in Bacteria Exposed to Metal-Contaminated Conditions
Source: Front Microbiol. 2019 Jan 15;9:3210. doi: 10.3389/fmicb.2018.03210 (PMC6341005; doi:10.3389/fmicb.2018.03210)
Supplement: Supplementary file 2 [file Table_3.xlsx]

## Sheet: Feuille2
Table S3. The list of peptides identified by mass spectrometry for sample SLP (purified S-layer protein).
Modifications	Sequence	m/z calc.	Mr calc.	z	m/z meas. Band 1	m/z meas. Band 2	m/z meas. Band 3
	K.GVSAVVPTK.V	857.509	856.502	1	857.509	857.51	857.509
	K.LGQQVTVK.A	872.52	871.513	1	872.521	872.52	872.52
	K.LEFTAPAK.A	438.745	875.475	2	438.744	438.744	438.745
	R.VISTVTNAK.F	932.541	931.534	1	932.542	932.541	932.541
	K.DNEIATFK.A	469.235	936.455	2	469.234	469.234	469.234
	K.VANATVNGVK.A	486.777	971.54	2	486.777	486.777	486.777
	K.TLTFVGK.K	383.229	764.443	2	383.228	383.228	383.228
	K.DYAFTAK.E	815.393	814.386	1	815.394	408.2	408.2
	K.VTYKDPK.T	425.737	849.46	2	425.737	425.736	850.467
Deamidated: 7	K.VANATVNGVK.A	487.269	972.524	2	487.269	487.269	487.269
	K.VISASIK.S	717.451	716.443	1	717.451	717.45	nd
	K.AATLPGK.A	657.393	656.386	1	657.393	657.392	657.393
	K.KPVSLK.D	671.445	670.438	1	671.445	671.445	671.445
	K.SYLNAK.K	695.372	694.365	1	695.373	695.372	695.373
Deamidated: 5	K.FVAENNAELSDLDAFVEELKK.Y	794.729	2381.16	3	794.73	794.729	nd
	K.QISVK.T	574.356	573.349	1	574.356	574.355	574.356
	K.GEATFTVSGTNATVTPVVYDLHDTK.N	875.101	2622.28	3	875.1	875.099	875.1
	K.INDYATPIAWIDINTSNAK.Q	707.36	2119.06	3	707.359	707.359	1060.54
	K.FVAENNAELSDLDAFVEELKK.Y	794.401	2380.18	3	794.4	794.399	794.4
	K.FSLGYVFWGVDTILSIEEVTK.D	801.754	2402.24	3	801.754	801.753	801.753
Oxidation: 5	K.VVGQMSYFQEAYLDGASIK.S	708.01	2121.01	3	708.009	708.009	708.009
	R.FNDLPVTTADKELVQYAALAK.D	769.746	2306.22	3	769.745	769.744	769.745
Deamidated: 11	K.DAGAFNGVNGNLNYSQNMAR.Q	705.317	2112.93	3	705.316	705.316	nd
	K.DAGAFNGVNGNLNYSQNMAR.Q	704.989	2111.94	3	704.988	1056.98	704.988
Deamidated: 9	K.DAGAFNGVNGNLNYSQNMAR.Q	1057.47	2112.93	2	nd	nd	1057.47
	K.ALQLSNATVLEAAQITTDSK.G	1037.55	2073.1	2	1037.55	1037.55	1037.55
	K.VVGQMSYFQEAYLDGASIK.S	1053.51	2105.01	2	1053.51	1053.51	1053.51
	K.EATATFTSTSEVPSNFIGR.V	1007.99	2013.96	2	1007.99	1007.99	1007.99
	K.DKETSNTITINPSGVNIQP.-	1014.52	2027.02	2	1014.51	1014.51	1014.52
	K.SVSYTVYNTGSNDIEVAGK.K	1002.48	2002.95	2	1002.48	1002.48	1002.48
	R.WLETEGYEIPTDWNSK.Q	984.455	1966.89	2	984.455	984.454	984.454
	R.GATPTDLYYADLADLANK.I	956.47	1910.93	2	956.47	956.47	956.469
	K.VVVLTTASQTADKEYTVSLDAEEIGK.F	923.146	2766.42	3	923.146	923.145	923.146
Oxidation: 14	K.VNFAAVQADYTLEMTR.T	615.633	1843.88	3	615.633	615.632	615.633
	R.SITLSYPGELSSADLDVK.A	947.986	1893.96	2	947.985	947.985	947.986
	K.FTSTLIPTGTSISTFTVK.D	634.347	1900.02	3	634.346	951.015	634.346
	K.FIDDENEVYYTGNEAK.Q	953.921	1905.83	2	953.921	953.92	953.921
Deamidated: 4	K.VLVNGTEGTVASVSSDKK.T	597.983	1790.93	3	597.982	597.981	597.982
	K.TFNVGFVENMNVTSDK.V	901.425	1800.84	2	901.424	901.424	901.424
Oxidation: 10	K.TFNVGFVENMNVTSDK.V	909.422	1816.83	2	909.423	909.421	909.422
	K.VNFAAVQADYTLEMTR.T	914.949	1827.88	2	914.948	914.948	914.948
	K.AQLVNQSDKVISASIK.S	567.656	1699.95	3	567.655	567.655	567.655
	K.VLVNGTEGTVASVSSDKK.T	597.655	1789.94	3	597.654	597.654	597.654
	K.AGIPVTFYVPGNSNDGVTPTVTGEAITDENGVASYSYTR.Y	1005.73	4018.91	4	1005.73	1005.73	1005.73
	K.VLVNGTEGTVASVSSDK.K	831.931	1661.85	2	831.93	831.93	831.93
	R.AAIGGGSGVTVDTYVTTLDSAK.I	1042.03	2082.05	2	1042.03	695.022	nd
	K.DLEIK.N	617.35	616.343	1	617.351	617.35	617.35
	K.NEVVNVAFNEDLDR.V	817.394	1632.77	2	817.394	817.394	817.394
	K.TDEKGEATFVIGSDK.I	532.93	1595.77	3	532.929	532.929	798.891
	K.DGVDEVTAYATGDR.S	734.831	1467.65	2	734.831	734.831	734.831
	K.FTSEISDLGGLNTEQR.E	883.931	1765.85	2	883.931	883.931	883.931
	R.YKDGVDEVTAYATGDR.S	587.276	1758.81	3	587.275	587.275	587.275
	K.GYPDGTFKPDQYVTR.G	581.949	1742.83	3	581.948	581.948	581.949
Deamidated: 4	K.VLVNGTEGTVASVSSDK.K	832.423	1662.83	2	832.423	832.422	832.422
	K.VAGSTTTLATTTIDSAQLLTTGNTLEVDGVK.F	1026.87	3077.6	3	1026.87	1026.87	nd
Deamidated: 6	K.FVAENNAELSDLDAFVEELKK.Y	794.729	2381.16	3	nd	nd	794.729
Deamidated: 26	K.GEATFTVSGTNATVTPVVYDLHDTKNNVSNK.K	820.905	3279.59	4	nd	nd	820.904
	K.FKDNEIATFK.A	606.817	1211.62	2	606.816	606.816	606.816
	K.TVVVK.F	545.366	544.358	1	545.366	545.365	545.365
	K.YTSGVEVQYIK.N	643.835	1285.66	2	643.835	643.834	643.834
	R.FNDLPVTTADK.E	610.812	1219.61	2	610.811	610.811	610.811
	K.VVSGILELTDTR.T	651.867	1301.72	2	651.866	651.866	651.867
	K.VVVLTTASQTADK.E	666.872	1331.73	2	666.872	666.871	666.872
	R.TGKFEVILNGNK.V	440.582	1318.72	3	nd	nd	440.582
	R.EAITALEYAELTK.A	726.385	1450.76	2	726.384	726.384	726.385
	K.EAISNLVDAGIIK.G	671.882	1341.75	2	671.882	671.881	671.882
	K.EYTVSLDAEEIGK.F	727.356	1452.7	2	727.356	727.355	727.356
Deamidated: 9	R.TGKFEVILNGNK.V	440.91	1319.71	3	nd	nd	440.909
	K.ALQLSNATVLEAAQITTDSKGEATFTVSGTNATVTPVVYDLHDTK.N	936.481	4677.37	5	nd	nd	936.478
	K.SVSYTVYNTGSNDIEVAGKK.V	711.355	2131.04	3	711.354		711.354
	K.GVSAVVPTKVELVAPSFQGK.L	671.717	2012.13	3	671.717	671.717	671.717
	K.KVVVLTTASQTADK.E	487.615	1459.82	3	487.615	487.614	487.615
	K.AFKPNDTITR.A	581.814	1161.61	2	581.814	581.814	581.814
	K.GEATFVIGSDK.I	562.285	1122.56	2	562.285	562.284	562.285
Deamidated: 9	K.EVAAIGETNGR.E	559.278	1116.54	2	559.277	559.277	559.278
	K.EVAAIGETNGR.E	558.786	1115.56	2	558.785	558.785	558.785
Deamidated: 6	K.DATINNGANK.T	509.744	1017.47	2	509.744	509.743	509.743
	K.DGKDYAFTAK.E	372.517	1114.53	3	372.517	372.516	372.517
	K.DATINNGANK.T	509.252	1016.49	2	nd	509.251	509.251
	K.ELVQYAALAK.D	553.316	1104.62	2	553.316	553.315	553.316
	K.AQLVNQSDK.V	501.764	1001.51	2	501.764	501.764	501.764
	R.VESVNTSDK.T	978.474	977.467	1	978.475	489.74	489.74
	K.YSASALQATASK.V	599.309	1196.6	2	599.309	599.308	599.308
	K.VELVAPSFQGK.L	587.827	1173.64	2	587.827	587.826	587.827
	K.KVVVLTTASQTADKEYTVSLDAEEIGK.F	724.635	2894.51	4	724.634	724.634	724.634
Deamidated: 5	K.AFKPNDTITR.A	388.54	1162.6	3	nd	nd	388.54
	K.AQVTVAEGQSK.A	559.296	1116.58	2	559.296	559.295	559.295
	K.AINNTTVEITFEQEVENVQALNFEIK.D	998.508	2992.5	3	998.507	998.507	998.507
	K.VESSAGTVGVAQEITFNFTSSFNVASGDK.V	983.809	2948.4	3	983.808	983.807	983.808
Oxidation: 18	K.DAGAFNGVNGNLNYSQNMAR.Q	710.32	2127.94	3	nd	nd	710.32
Deamidated: 2	R.FNDLPVTTADK.E	611.304	1220.59	2	611.304	611.304	611.303
Deamidated: 6	K.FEVILNGNK.V	517.779	1033.54	2	517.779	517.779	517.779
	R.QQMAIVLVR.A	529.313	1056.61	2	529.313	529.312	529.312
	R.AQFASFLDR.T	527.769	1053.52	2	527.769	527.769	527.769
	K.FVAENNAELSDLDAFVEELK.K	751.702	2252.08	3	751.701	751.701	751.701
Deamidated: 1	K.NEVVNVAFNEDLDR.V	817.886	1633.76	2	nd	nd	817.887
Deamidated: 14	R.WLETEGYEIPTDWNSK.Q	984.947	1967.88	2	nd	nd	984.947
	K.FEVILNGNK.V	517.287	1032.56	2	517.287	517.287	517.287
	K.ETSNTITINPSGVNIQP.-	892.955	1783.9	2	nd	nd	892.954
	K.VIATGVAINPK.D	541.832	1081.65	2	541.831	541.831	541.832
	K.KYSASALQATASK.V	442.574	1324.7	3	442.573	442.573	442.573
	K.EIQEVDLVK.E	536.798	1071.58	2	536.797	536.797	536.797
	R.GQVVK.L	530.33	529.322	1	nd	530.329	530.329
Oxidation: 3	R.QQMAIVLVR.A	537.31	1072.61	2	537.31	537.31	537.31
	K.QGTLDEGEPK.V	537.259	1072.5	2	537.259	537.258	537.259
